# Supplementary material for: An obesity-associated gut microbiome reprograms the intestinal epigenome and leads to altered colonic gene expression
Source: Genome Biol. 2018 Jan 23;19:7. doi: 10.1186/s13059-018-1389-1 (PMC5782396; doi:10.1186/s13059-018-1389-1)
Supplement: Supplementary file 3 — This file contains tables providing bacterial abundance for male and female mice across the time points and diets utilized in the study. (XLSX 94 kb) [file 13059_2018_1389_MOESM3_ESM.xlsx]

## Sheet: Table S2A
Table S2A	Relative abundance of microbiota in male mice
Phylum	Class	Order	Family	HF1	HF10	HF2	HF3	HF4	HF5	HF6	HF7	HF8	HF9	LF1	LF10	LF2	LF3	LF4	LF5	LF6	LF7	LF8	LF9
p__Actinobacteria	c__Actinobacteria	o__Actinomycetales	f__Corynebacteriaceae	0	0	0	0	0	0	0	0	0	0	0	0	0	0	0	0	0	1.06183e-05	1.06183e-05	0
p__Actinobacteria	c__Actinobacteria	o__Actinomycetales	f__Microbacteriaceae	0	0	0	0	0	0	0	0	0	0	0	1.06183e-05	0	0	0	0	0	0	0	0
p__Actinobacteria	c__Actinobacteria	o__Actinomycetales	f__Micrococcaceae	0	0	0	0	0	0	0	0	0	0	0	0	0	0	0	0	0	0	1.06183e-05	0
p__Actinobacteria	c__Actinobacteria	o__Actinomycetales	f__Propionibacteriaceae	0	2.12366e-05	1.06183e-05	0	0	0	0	0	0	0	0	0	0	0	0	0	0	0	3.18549e-05	0
p__Actinobacteria	c__Actinobacteria	o__Actinomycetales	unclassified	1.06183e-05	0	0	0	0	0	0	1.06183e-05	0	0	0	1.06183e-05	0	0	0	0	0	0	0	2.12366e-05
p__Actinobacteria	c__Actinobacteria	o__Bifidobacteriales	f__Bifidobacteriaceae	2.12366e-05	0	0	0	1.06183e-05	0	0	1.06183e-05	0	0	0.0301772	0.0259087	0.000318549	2.12366e-05	0.00923792	0.000148656	0.0605562	3.18549e-05	0.030655	0.0382365
p__Actinobacteria	c__Coriobacteriia	o__Coriobacteriales	f__Coriobacteriaceae	0.00212366	0.00116801	0.000891938	0.00161398	0.0022617	0.00116801	0.000382259	0.0016246	0.00113616	0.000987502	0.00318549	0.000838846	0.000159275	0.000159275	0.00183697	0.000265458	0.000955647	0.00116801	0.00141223	0.00192191
p__Actinobacteria	unclassified	unclassified	unclassified	0	0.0016246	0	0	0	0	0	0	0	0	0	0	0	0	0	0	0.00288818	2.12366e-05	0	0.00190068
p__Bacteroidetes	c__Bacteroidia	o__Bacteroidales	f__Bacteroidaceae	2.12366e-05	0	7.43281e-05	3.18549e-05	0.340285	8.49464e-05	1.06183e-05	1.06183e-05	0.0504157	0.14168	2.12366e-05	0	0.0855304	2.12366e-05	0.000307931	1.06183e-05	0	0.000191129	1.06183e-05	3.18549e-05
p__Bacteroidetes	c__Bacteroidia	o__Bacteroidales	f__Porphyromonadaceae	0	0	0	0	0	0	0	0	0.0638585	0	0	0	0	1.06183e-05	0	0	0	0	0	1.06183e-05
p__Bacteroidetes	c__Bacteroidia	o__Bacteroidales	f__Rikenellaceae	0	0.00441721	0.00593563	0	0	0	0.0153541	0.00294127	0.0349661	0.0134534	0.103486	0.0186033	0.0138463	0.126156	9.55647e-05	0.000891938	0.0521996	0.020865	0.000191129	1.06183e-05
p__Bacteroidetes	c__Bacteroidia	o__Bacteroidales	f__S24-7	0.42899	0.450418	0.387908	0.339733	0.240685	0.361436	0.568377	0.100916	0.185927	0.0665024	0.231054	0.540153	0.254457	0.310777	0.682768	0.599223	0.294297	0.497818	0.401414	0.285006
p__Bacteroidetes	c__Bacteroidia	o__Bacteroidales	f__[Barnesiellaceae]	0	0	3.18549e-05	0	0	0	0	0	1.06183e-05	0	0	0	2.12366e-05	0	0	0	0	0	0	0
p__Bacteroidetes	c__Bacteroidia	o__Bacteroidales	f__[Odoribacteraceae]	0	0	0	0	0	0	0	0	0.00896185	0.00560646	0.0654512	0	8.49464e-05	0.0487805	9.55647e-05	8.49464e-05	0.0181573	0	0.00599934	0.019697
p__Bacteroidetes	c__Bacteroidia	o__Bacteroidales	unclassified	0.000276076	0.00211304	0.00897247	0.100046	0.000849464	0.000191129	0.00492689	0.00914236	0.0610552	0.0569353	0.043036	0.181754	0.127579	0.315926	0.0057445	0.00447031	0.190439	0.23356	0.150111	0.147701
p__Bacteroidetes	c__Flavobacteriia	o__Flavobacteriales	f__Flavobacteriaceae	0	0	1.06183e-05	0	0	0	0	0	0	0	0	0	0	0	0	0	0	0	0	0
p__Bacteroidetes	c__Flavobacteriia	o__Flavobacteriales	f__[Weeksellaceae]	0	0	0	0	0	0	0	8.49464e-05	1.06183e-05	0	0	0	0	0	0	1.06183e-05	0	0	1.06183e-05	2.12366e-05
p__Bacteroidetes	c__Sphingobacteriia	o__Sphingobacteriales	f__Sphingobacteriaceae	0	1.06183e-05	0	0	0	1.06183e-05	0	1.06183e-05	0	1.06183e-05	0	0	0	0	0	0	0	0	3.18549e-05	0
p__Bacteroidetes	c__[Saprospirae]	o__[Saprospirales]	f__Chitinophagaceae	0	1.06183e-05	0	0	0	0	4.24732e-05	0	5.30915e-05	7.43281e-05	0	0	0	0	0	0	1.06183e-05	3.18549e-05	0.000233603	0.000191129
p__Bacteroidetes	unclassified	unclassified	unclassified	0	0	2.12366e-05	2.12366e-05	0	2.12366e-05	2.12366e-05	3.18549e-05	0.00622233	0.00563832	4.24732e-05	8.49464e-05	0.0982936	0.00233603	4.24732e-05	1.06183e-05	0.0655362	6.37098e-05	0.000148656	9.55647e-05
p__Chlamydiae	c__Chlamydiia	o__Chlamydiales	f__Parachlamydiaceae	0	0	0	0	0	0	0	0	0	1.06183e-05	0	0	0	0	0	0	0	0	0	0
p__Chloroflexi	c__Anaerolineae	o__SBR1031	f__A4b	0	0	0	0	0	0	0	0	0	0	0	0	0	0	0	0	0	0	0	1.06183e-05
p__Cyanobacteria	c__4C0d-2	o__MLE1-12	unclassified	0	0	0	0	0	0	0	0	0	0	0	0	0	0	0	0	0	0	0	1.06183e-05
p__Cyanobacteria	c__4C0d-2	o__YS2	unclassified	0	0	0	0	0	0	0	0	0	0	0	0	0	0.000414114	0	0	0	0	0	5.30915e-05
p__Firmicutes	c__Bacilli	o__Bacillales	f__Bacillaceae	0	0	0	0	0	0	0	0	1.06183e-05	0	0	0	0	0	4.24732e-05	1.06183e-05	0	0	1.06183e-05	3.18549e-05
p__Firmicutes	c__Bacilli	o__Bacillales	f__Planococcaceae	0	0	0	0	0	0	0	1.06183e-05	2.12366e-05	0	0	0	0	2.12366e-05	0	0	0	0	1.06183e-05	2.12366e-05
p__Firmicutes	c__Bacilli	o__Bacillales	unclassified	0	1.06183e-05	0	0	0	0	0	0	0	0	0	0	0	0	0	0	0	0	0	2.12366e-05
p__Firmicutes	c__Bacilli	o__Lactobacillales	f__Aerococcaceae	0	0	0	0	0	0	0	0	0	0	0	0	0	0	0	0	0	0	2.12366e-05	0
p__Firmicutes	c__Bacilli	o__Lactobacillales	f__Enterococcaceae	4.24732e-05	2.12366e-05	9.55647e-05	5.30915e-05	5.30915e-05	1.06183e-05	0	1.06183e-05	0	0.00012742	0	4.24732e-05	0	1.06183e-05	0	9.55647e-05	0	3.18549e-05	0.000138038	8.49464e-05
p__Firmicutes	c__Bacilli	o__Lactobacillales	f__Lactobacillaceae	1.06183e-05	1.06183e-05	0	1.06183e-05	0.00491627	0	0.000711426	0	0	0.000913174	1.06183e-05	0	0	0	0	0	0	1.06183e-05	0	1.06183e-05
p__Firmicutes	c__Bacilli	o__Lactobacillales	f__Streptococcaceae	0.00312178	0.00443845	0.00204933	0.00253777	0.00302622	0.00155027	0.00142285	0.00477824	0.00387568	0.00386506	0.000276076	0.00355713	0.000541533	0.000806991	0.00117863	0.00189006	0.0031324	0.00314302	0.0100555	0.00940782
p__Firmicutes	c__Bacilli	o__Lactobacillales	unclassified	0	0.0031324	1.06183e-05	1.06183e-05	1.06183e-05	0	0.000276076	0.00621171	0.00229355	1.06183e-05	4.24732e-05	0	8.49464e-05	0.000180511	5.30915e-05	0	0.000509679	0.00157151	0.00466144	0.000658335
p__Firmicutes	c__Bacilli	o__Turicibacterales	f__Turicibacteraceae	0	0	1.06183e-05	0	1.06183e-05	0	0	0	0	0.000106183	1.06183e-05	0.00749652	0.0262272	0.0173503	3.18549e-05	0.0550453	0	0.00692313	0.00597811	0.0194421
p__Firmicutes	c__Bacilli	unclassified	unclassified	1.06183e-05	0	0	2.12366e-05	0	0	0	2.12366e-05	0	0	0	0	1.06183e-05	0	0	1.06183e-05	0	1.06183e-05	1.06183e-05	2.12366e-05
p__Firmicutes	c__Clostridia	o__Clostridiales	f__Christensenellaceae	0.00740096	0.0186882	0.0146851	0.00265458	0.00837784	0.00557461	0.00966266	0.0238062	0.0035996	0.00488442	0.000339786	0.000445969	0.000913174	0.000711426	0.000392877	0.00230417	0.000106183	0.000307931	0.000615862	0.00146533
p__Firmicutes	c__Clostridia	o__Clostridiales	f__Clostridiaceae	1.06183e-05	2.12366e-05	0.000955647	0.000307931	0.0302197	5.30915e-05	9.55647e-05	9.55647e-05	8.49464e-05	0.000201748	4.24732e-05	0.0038863	0.00405619	0.00180511	0	0.0146745	4.24732e-05	0.00234665	0.00710365	0.000106183
p__Firmicutes	c__Clostridia	o__Clostridiales	f__Dehalobacteriaceae	0	0	0	0	2.12366e-05	0	3.18549e-05	0	0	5.30915e-05	2.12366e-05	0	1.06183e-05	0	0	0	0	0	0	0
p__Firmicutes	c__Clostridia	o__Clostridiales	f__Lachnospiraceae	0.120252	0.11763	0.161494	0.197777	0.0892787	0.158797	0.0740733	0.223452	0.196534	0.265861	0.219916	0.0578273	0.107202	0.0702188	0.0500016	0.109814	0.0354864	0.0977415	0.0683713	0.0721726
p__Firmicutes	c__Clostridia	o__Clostridiales	f__Peptostreptococcaceae	0.0289349	0.021587	0.011128	0.0318655	0.0165221	0.00779384	0.0064984	0.0215021	0.00317487	0.0137826	0.000212366	0.00288818	0.000838846	0.000934411	2.12366e-05	0.000679571	8.49464e-05	0.0024953	2.12366e-05	1.06183e-05
p__Firmicutes	c__Clostridia	o__Clostridiales	f__Ruminococcaceae	0.109836	0.142699	0.154751	0.163575	0.0864648	0.199932	0.129257	0.334562	0.17774	0.207439	0.124192	0.0487593	0.163129	0.0761226	0.0500334	0.0942374	0.0121049	0.0719284	0.0643151	0.0411672
p__Firmicutes	c__Clostridia	o__Clostridiales	unclassified	0.113361	0.16968	0.212143	0.00545781	0.0730115	0.226032	0.112756	0.194559	0.167504	0.134024	0.00417299	0.0477399	0.0801257	0.00568079	0.00118925	0.0756236	0.00692313	0.0021449	0.053941	0.063816
p__Firmicutes	c__Clostridia	unclassified	unclassified	0.000743281	0.00367393	0.00482071	0.00117863	0.00318549	0.00126358	0.00366331	0.00191129	0.0026121	0.00559585	0.00265458	0.00105121	0.0012211	0.000382259	0.000445969	0.000945029	0.000180511	0.00183697	0.00100874	0.00102998
p__Firmicutes	c__Erysipelotrichi	o__Erysipelotrichales	f__Erysipelotrichaceae	0.0359854	0.014271	0.0153116	0.0374932	0.0388205	0.00507555	0.0066152	0.00637098	0.000307931	0.00399248	0.0257069	0.0134428	0.0034828	0.00611614	0.0594837	0.0110006	0.0606836	0.0231904	0.0462002	0.00293065
p__Firmicutes	unclassified	unclassified	unclassified	0.0173078	0.0102042	0.0051605	0.0204296	0.0138144	0.00906803	0.00114678	0.017414	0.00605243	0.0119668	0.0266095	0.0338193	0.00831413	0.00317487	0.0212685	0.001975	0.162492	0.00329167	0.128492	0.272243
p__OD1	c__SM2F11	unclassified	unclassified	0	0	0	0	0	0	0	0	0	0	0	0	0	0	0	0	0	0	1.06183e-05	0
p__Planctomycetes	c__Phycisphaerae	o__Phycisphaerales	unclassified	0	0	0	0	0	0	0	0	0	0	0	0	0	0	0	0	0	0	1.06183e-05	1.06183e-05
p__Proteobacteria	c__Alphaproteobacteria	o__BD7-3	unclassified	0	0	0	0	0	0	0	0	0	0	0	0	0	1.06183e-05	0	0	0	0	0	0
p__Proteobacteria	c__Alphaproteobacteria	o__Caulobacterales	f__Caulobacteraceae	0	1.06183e-05	4.24732e-05	0	0	0	1.06183e-05	2.12366e-05	4.24732e-05	2.12366e-05	1.06183e-05	3.18549e-05	0	0	1.06183e-05	0	0	1.06183e-05	4.24732e-05	6.37098e-05
p__Proteobacteria	c__Alphaproteobacteria	o__Ellin329	unclassified	0	0	0	0	0	0	0	0	0	0	0	0	0	0	0	0	0	0	1.06183e-05	2.12366e-05
p__Proteobacteria	c__Alphaproteobacteria	o__Rhizobiales	f__Bradyrhizobiaceae	0	0	0	0	0	0	0	0	0	0	0	0	0	0	0	1.06183e-05	0	0	0	0
p__Proteobacteria	c__Alphaproteobacteria	o__Rhizobiales	f__Hyphomicrobiaceae	0	0	0	0	0	0	0	0	1.06183e-05	1.06183e-05	0	0	0	0	0	0	0	2.12366e-05	2.12366e-05	0
p__Proteobacteria	c__Alphaproteobacteria	o__Rhizobiales	f__Methylobacteriaceae	0	0	0	0	0	0	1.06183e-05	0	0	0	0	0	0	0	0	0	0	3.18549e-05	3.18549e-05	4.24732e-05
p__Proteobacteria	c__Alphaproteobacteria	o__Rhizobiales	unclassified	0	0	0	0	0	0	0	0	0	0	0	0	0	0	0	0	0	0	2.12366e-05	1.06183e-05
p__Proteobacteria	c__Alphaproteobacteria	o__Rhodospirillales	f__Rhodospirillaceae	0	0	0	0	0	0	3.18549e-05	0	0	4.24732e-05	0	1.06183e-05	0	0	0	0	1.06183e-05	2.12366e-05	4.24732e-05	1.06183e-05
p__Proteobacteria	c__Alphaproteobacteria	o__Sphingomonadales	f__Sphingomonadaceae	0	0	0	0	0	0	0	1.06183e-05	0	0	0	0	0	0	0	0	0	0	0	0
p__Proteobacteria	c__Alphaproteobacteria	o__Sphingomonadales	unclassified	0	0	0	0	0	0	1.06183e-05	0	1.06183e-05	4.24732e-05	0	0	0	0	0	0	0	2.12366e-05	6.37098e-05	6.37098e-05
p__Proteobacteria	c__Alphaproteobacteria	unclassified	unclassified	0	0	0	0	0	0	0	0	1.06183e-05	0	0	0	0	0	0	0	0	0	0	0
p__Proteobacteria	c__Betaproteobacteria	o__Burkholderiales	f__Alcaligenaceae	0	0.000138038	1.06183e-05	0.00012742	0.0177538	1.06183e-05	0.0180299	0	0	0	0.0388311	0.000392877	1.06183e-05	1.06183e-05	0.0332353	0	0.00834599	0	0	0
p__Proteobacteria	c__Betaproteobacteria	o__Burkholderiales	f__Comamonadaceae	0	0	0	0	1.06183e-05	0	1.06183e-05	1.06183e-05	2.12366e-05	2.12366e-05	0	1.06183e-05	0	0	0	0	0	4.24732e-05	8.49464e-05	2.12366e-05
p__Proteobacteria	c__Betaproteobacteria	o__Burkholderiales	unclassified	1.06183e-05	0.000148656	0.000615862	0.0826847	0.0207694	0.000116801	0.0257812	3.18549e-05	0	0	0.0462109	0.000594625	3.18549e-05	0	0.0401584	2.12366e-05	0.010183	0	1.06183e-05	0
p__Proteobacteria	c__Betaproteobacteria	o__Rhodocyclales	f__Rhodocyclaceae	0	1.06183e-05	0	1.06183e-05	0	0	8.49464e-05	3.18549e-05	3.18549e-05	3.18549e-05	0	2.12366e-05	0	0	0	0	2.12366e-05	0.00012742	0.000265458	0.000254839
p__Proteobacteria	c__Betaproteobacteria	unclassified	unclassified	0	1.06183e-05	0	6.37098e-05	1.06183e-05	0	1.06183e-05	1.06183e-05	1.06183e-05	1.06183e-05	3.18549e-05	2.12366e-05	2.12366e-05	0	2.12366e-05	0	1.06183e-05	0	1.06183e-05	4.24732e-05
p__Proteobacteria	c__Deltaproteobacteria	o__Desulfovibrionales	f__Desulfovibrionaceae	0.00175202	0.022256	0.00766642	1.06183e-05	2.12366e-05	0.0164584	2.12366e-05	0.0479841	0.012657	0.0439385	0.0134322	0.00184758	0.0153222	0.0044066	0.00847341	0.00318549	0.00151842	0.00659397	0.00559585	0.011043
p__Proteobacteria	c__Deltaproteobacteria	o__Myxococcales	f__Cystobacteraceae	0	0	0	0	0	0	0	0	0	0	0	0	0	0	0	0	0	0	1.06183e-05	0
p__Proteobacteria	c__Gammaproteobacteria	o__Enterobacteriales	f__Enterobacteriaceae	0	0	0	0	0	0	0	0	0	0	1.06183e-05	0	0	0	0	0	0	0	1.06183e-05	0
p__Proteobacteria	c__Gammaproteobacteria	o__Pseudomonadales	f__Moraxellaceae	0	0	0	0	0	0	0	0	0	0	0	0	0	0	0	0	0	1.06183e-05	0	0
p__Proteobacteria	c__Gammaproteobacteria	o__Pseudomonadales	f__Pseudomonadaceae	0	0	0	0	0	0	0	0	1.06183e-05	2.12366e-05	0	0	0	1.06183e-05	0	0	2.12366e-05	0	4.24732e-05	8.49464e-05
p__Proteobacteria	c__Gammaproteobacteria	o__Xanthomonadales	f__Xanthomonadaceae	0	0	0	0	0	0	0	0	0	0	0	1.06183e-05	0	0	0	0	0	0	3.18549e-05	2.12366e-05
p__Proteobacteria	c__Gammaproteobacteria	unclassified	unclassified	0	0	0	0	0	0	0	1.06183e-05	0	1.06183e-05	0	0	0	0	0	0	0	1.06183e-05	0	0
p__Proteobacteria	unclassified	unclassified	unclassified	0	4.24732e-05	0	8.49464e-05	6.37098e-05	0	0.000169893	9.55647e-05	0.000116801	0.000116801	0.00975822	1.06183e-05	0	1.06183e-05	2.12366e-05	0	0.000116801	6.37098e-05	0.000700808	0.00062648
p__Synergistetes	c__Synergistia	o__Synergistales	f__Dethiosulfovibrionaceae	0	0	0	0	0	0	0	0	0	1.06183e-05	0	0	0	0	0	0	0	0	0	0
p__TM7	c__SC3	unclassified	unclassified	0	0	0	1.06183e-05	0	0	0	0	0	0	0	0	0	0	0	0	0	0	0	0
p__TM7	c__TM7-1	unclassified	unclassified	0	0	0	0	0	0	0	0	0	0	0	0	0	0	0	0	1.06183e-05	0	0	0
p__TM7	c__TM7-3	o__CW040	f__F16	0	0	0	0.000966266	0	0	0	0	0	0	0.00186882	0.0022617	0.003366	0.000541533	0.000212366	0.000169893	0.00232541	0.0136976	0.00345095	0.00415176
p__Tenericutes	c__Mollicutes	o__Anaeroplasmatales	f__Anaeroplasmataceae	0	0	0	0	0	0	0	0	0	0	0	8.49464e-05	0	0	0	0	0.000605243	0.000116801	0	0
p__Tenericutes	c__Mollicutes	o__RF39	unclassified	0	0.00166707	0.000424732	0	0	3.18549e-05	0	0	0.000647717	0	0.00547904	0.00167769	0.000233603	0.00049906	1.06183e-05	0.000297313	0.00833537	0.000414114	0.000732663	0.000329167
p__Tenericutes	c__Mollicutes	unclassified	unclassified	0	0	0	0	0	0	0	0	0	0	0	2.12366e-05	0	0	0	1.06183e-05	1.06183e-05	0	0	0
p__Verrucomicrobia	c__Verrucomicrobiae	o__Verrucomicrobiales	f__Verrucomicrobiaceae	0	0	0	0	0	0	0.0161611	0	0	0.000350404	0	0	0	0	0.00890876	0	1.06183e-05	0	0	0
p__[Thermi]	c__Deinococci	o__Thermales	f__Thermaceae	0	0	0	0	0	0	0	0	0	0	0	0	2.12366e-05	0	0	0	0	0	0	1.06183e-05
unclassified	unclassified	unclassified	unclassified	0.129777	0.0098644	0.00476762	0.0112235	0.00954586	0.00531977	0.00434289	0.00230417	0.0100024	0.0116483	0.00370579	0.00468267	0.00454463	0.00639222	0.0246769	0.0228824	0.00168831	0.00808053	0.00757085	0.00363146

## Sheet: Table S2B
Table S2B	Relative abundance of microbiota in female mice
Phylum	Class	Order	Family	HF21	HF22	HF23	HF24	HF25	HF26	HF27	HF28	HF29	HF30	LF31	LF32	LF33	LF34	LF36	LF37	LF38	LF39	LF40
p__Actinobacteria	c__Actinobacteria	o__Actinomycetales	f__Corynebacteriaceae	2.95192e-06	0	0	0	0	0	0	0	0	0	0	0	0	0	0	0	0	0	0
p__Actinobacteria	c__Actinobacteria	o__Actinomycetales	f__Microbacteriaceae	0	2.95192e-06	0	0	0	0	0	2.95192e-06	0	0	0	0	0	0	0	0	5.90383e-06	0	0
p__Actinobacteria	c__Actinobacteria	o__Actinomycetales	f__Micrococcaceae	2.95192e-06	0	0	0	0	0	0	0	0	0	0	0	0	0	0	0	0	0	0
p__Actinobacteria	c__Actinobacteria	o__Actinomycetales	f__Nocardioidaceae	0	0	0	2.95192e-06	0	0	0	0	0	0	0	0	0	0	0	0	0	0	0
p__Actinobacteria	c__Actinobacteria	o__Actinomycetales	f__Propionibacteriaceae	0	0	0	0	0	0	0	0	0	0	0	0	0	0	5.90383e-06	0	0	0	0
p__Actinobacteria	c__Actinobacteria	o__Actinomycetales	unclassified	8.85575e-06	0	0	0	0	2.95192e-06	2.95192e-06	0	0	0	0	0	0	0	2.95192e-06	0	0	0	0
p__Actinobacteria	c__Actinobacteria	o__Bifidobacteriales	f__Bifidobacteriaceae	0	2.95192e-06	2.95192e-06	2.95192e-06	8.85575e-06	0	0	2.95192e-06	5.90383e-06	0	0.0127021	0.0434286	0.0141338	0	0.00342717	0.000802921	0.0152142	0.03168	0.00572967
p__Actinobacteria	c__Coriobacteriia	o__Coriobacteriales	f__Coriobacteriaceae	0.000466403	0.00316741	0.00223755	0.00220508	0.00102136	0.00159994	0.000891479	0.000891479	0.00105383	0.0013136	0.000640566	0.000794065	0.00027748	0.000410316	0.000684845	0.000112173	0.000882623	0.000593335	0.00189808
p__Actinobacteria	unclassified	unclassified	unclassified	0	0	0	0	2.95192e-06	0	0	0	0	0	0	0.00197188	0.00122209	0	0.00206929	0.000593335	0.00149072	0.00140216	0.00609866
p__Bacteroidetes	c__Bacteroidia	o__Bacteroidales	f__Rikenellaceae	0	0	0	0	0	0	0	0	0	0	0	0.00376074	0	0	0	0	0	0	0
p__Bacteroidetes	c__Bacteroidia	o__Bacteroidales	f__S24-7	0.342289	0.187444	0.298905	0.459079	0.316764	0.393461	0.0894254	0.254195	0.462232	0.241331	0.808223	0.558467	0.782208	0.750501	0.46325	0.778621	0.622391	0.268875	0.48376
p__Bacteroidetes	c__Bacteroidia	o__Bacteroidales	f__[Barnesiellaceae]	0	2.95192e-06	0	2.95192e-06	0	0	0	0	8.85575e-06	0	0	0.00127818	0	0	0	2.95192e-06	5.90383e-06	0	2.95192e-06
p__Bacteroidetes	c__Bacteroidia	o__Bacteroidales	f__[Odoribacteraceae]	0	2.95192e-06	0	0	0	0	0	0	0	0	0	0.0156422	2.95192e-06	2.95192e-06	2.95192e-06	0	0	0	0
p__Bacteroidetes	c__Bacteroidia	o__Bacteroidales	unclassified	0.00041622	0.000100365	0.000280432	0.000360134	0.000242057	0.000221394	7.37979e-05	0.000135788	0.000256817	0.000318807	0.000386701	0.142769	0.000301095	0.000271576	0.000180067	0.000271576	0.000165307	0.159486	0.000250913
p__Bacteroidetes	c__Flavobacteriia	o__Flavobacteriales	f__Flavobacteriaceae	0	0	0	0	0	0	0	0	0	0	0	0	0	0	0	0	2.95192e-06	0	2.95192e-06
p__Bacteroidetes	c__Flavobacteriia	o__Flavobacteriales	f__[Weeksellaceae]	0	2.95192e-06	0	0	0	0	0	2.95192e-06	0	0	0	0	0	0	0	0	2.95192e-06	0	2.95192e-06
p__Bacteroidetes	c__Flavobacteriia	o__Flavobacteriales	unclassified	0	0	0	0	0	0	0	0	0	0	0	0	0	0	0	0	0	5.90383e-06	0
p__Bacteroidetes	c__Sphingobacteriia	o__Sphingobacteriales	f__Sphingobacteriaceae	2.95192e-06	0	0	0	0	5.90383e-06	5.90383e-06	0	2.95192e-06	0	0	0	2.95192e-06	0	8.85575e-06	0	8.85575e-06	0	0
p__Bacteroidetes	c__[Saprospirae]	o__[Saprospirales]	f__Chitinophagaceae	2.95192e-06	0	0	2.95192e-06	2.95192e-06	2.95192e-06	0	0	0	2.95192e-06	0	0	0	0	2.95192e-06	0	2.95192e-06	5.90383e-06	0
p__Bacteroidetes	unclassified	unclassified	unclassified	1.18077e-05	2.95192e-06	1.18077e-05	1.77115e-05	2.65672e-05	2.06634e-05	1.18077e-05	1.77115e-05	5.90383e-06	8.85575e-06	2.95192e-05	6.19902e-05	8.85575e-06	2.06634e-05	5.90383e-06	8.85575e-06	2.06634e-05	3.24711e-05	1.18077e-05
p__Firmicutes	c__Bacilli	o__Lactobacillales	f__Streptococcaceae	0	0	0	0	5.90383e-06	0	0	0	0	0	0	0	0	0	0	0	0	0	0
p__Firmicutes	c__Bacilli	o__Turicibacterales	f__Turicibacteraceae	0	0	0	0	0	2.95192e-06	0	0	0	0	0	0	0	1.77115e-05	0	1.18077e-05	0	0	2.95192e-06
p__Firmicutes	c__Bacilli	unclassified	unclassified	0	0	1.18077e-05	2.95192e-06	8.85575e-06	2.95192e-06	0	2.95192e-06	5.90383e-06	0	0	0	8.85575e-06	0	0	0	0	5.90383e-06	0
p__Firmicutes	c__Clostridia	o__Clostridiales	f__Christensenellaceae	0.0020073	0.00446035	0.00440426	0.00363086	0.010621	0.00514224	0.00503007	0.0198871	0.00564406	0.00379912	0.0010007	0.00102136	0.00112763	0.00316445	0.00480867	0.00105088	0.00228183	0.00128704	0.00420943
p__Firmicutes	c__Clostridia	o__Clostridiales	f__Clostridiaceae	2.95192e-06	0	8.85575e-06	0	0.000147596	0.00742407	0	0.000342422	7.67498e-05	5.90383e-06	0.00713773	0.00932215	0.0035364	0.0109132	0.00779306	0.00204863	0.00721448	0.0001535	0.0315265
p__Firmicutes	c__Clostridia	o__Clostridiales	f__Lachnospiraceae	0.205997	0.348887	0.313877	0.163787	0.227224	0.210569	0.331158	0.380762	0.132574	0.250222	0.0771926	0.100826	0.0791763	0.102263	0.216798	0.0807615	0.156062	0.326939	0.201761
p__Firmicutes	c__Clostridia	o__Clostridiales	f__Peptostreptococcaceae	0	0	0	0	2.95192e-06	5.90383e-06	0	0	0	0	0	0	2.95192e-06	0	0	0	2.95192e-06	0	2.95192e-06
p__Firmicutes	c__Clostridia	o__Clostridiales	f__Ruminococcaceae	0.232475	0.199656	0.205507	0.0644994	0.201507	0.109301	0.201743	0.25269	0.085886	0.247592	0.044875	0.0661229	0.0628611	0.0551477	0.112111	0.0451407	0.078887	0.115948	0.13559
p__Firmicutes	c__Clostridia	o__Clostridiales	unclassified	0.115426	0.0969823	0.0907301	0.129589	0.0831437	0.148112	0.0247016	0.0183639	0.16753	0.156868	0.0310069	0.00422714	0.0373713	0.033457	0.0379144	0.0683929	0.0403114	0.00628758	0.0229452
p__Firmicutes	c__Clostridia	unclassified	unclassified	0.00121029	0.00245009	0.00189513	0.00245304	0.000844248	0.00748311	0.00150548	0.0011601	0.00641451	0.00573853	0.00160584	0.000481162	0.00113354	0.00208996	0.000737979	0.00217261	0.00116896	0.000377845	0.00640861
p__Firmicutes	c__Erysipelotrichi	o__Erysipelotrichales	f__Erysipelotrichaceae	1.77115e-05	0	2.95192e-06	2.95192e-06	0	0	5.90383e-06	2.95192e-06	2.95192e-06	1.18077e-05	2.95192e-06	0	0	2.95192e-06	0	0	0	0	2.65672e-05
p__Firmicutes	unclassified	unclassified	unclassified	0.000549056	0.000236153	0.000135788	0.000100365	0.000156452	0.000132836	5.31345e-05	0.000265672	0.000191875	0.000132836	4.42787e-05	5.01826e-05	0.000445739	2.95192e-05	0.000315855	0.000191875	0.000203682	0.000115125	5.01826e-05
p__GN02	c__GKS2-174	unclassified	unclassified	0	5.90383e-06	0	0	0	0	0	0	0	0	0	0	0	0	0	0	5.90383e-06	0	0
p__Nitrospirae	c__Nitrospira	o__Nitrospirales	f__Nitrospiraceae	0	0	2.95192e-06	0	0	0	0	0	0	0	0	0	0	0	0	0	0	0	0
p__Proteobacteria	c__Alphaproteobacteria	o__Caulobacterales	f__Caulobacteraceae	1.47596e-05	1.47596e-05	5.90383e-06	2.95192e-06	2.95192e-06	5.90383e-06	8.85575e-06	5.90383e-06	1.18077e-05	8.85575e-06	1.18077e-05	0	2.95192e-06	5.90383e-06	2.95192e-06	5.90383e-06	0	5.90383e-06	2.36153e-05
p__Proteobacteria	c__Alphaproteobacteria	o__Rhizobiales	f__Bradyrhizobiaceae	0	0	0	0	2.95192e-06	0	0	0	0	0	5.90383e-06	2.95192e-06	2.95192e-06	0	2.95192e-06	0	0	0	0
p__Proteobacteria	c__Alphaproteobacteria	o__Rhizobiales	f__Hyphomicrobiaceae	0	2.95192e-06	2.95192e-06	5.90383e-06	2.95192e-06	2.95192e-06	0	2.95192e-06	0	2.95192e-06	2.95192e-06	0	0	0	0	2.95192e-06	5.90383e-06	0	0
p__Proteobacteria	c__Alphaproteobacteria	o__Rhizobiales	f__Methylobacteriaceae	0	0	2.95192e-06	0	0	0	0	0	0	0	0	0	0	0	0	0	0	0	2.95192e-06
p__Proteobacteria	c__Alphaproteobacteria	o__Rhizobiales	f__Rhizobiaceae	0	0	8.85575e-06	0	8.85575e-06	0	0	0	2.95192e-06	0	0	0	0	0	0	0	0	0	0
p__Proteobacteria	c__Alphaproteobacteria	o__Rhizobiales	unclassified	2.95192e-06	0	5.90383e-06	0	0	2.95192e-06	0	0	0	0	0	0	0	0	0	0	0	0	0
p__Proteobacteria	c__Alphaproteobacteria	o__Rhodobacterales	f__Rhodobacteraceae	0	2.95192e-06	0	0	0	5.90383e-06	0	0	0	0	0	0	0	0	0	0	5.90383e-06	0	0
p__Proteobacteria	c__Alphaproteobacteria	o__Rhodospirillales	f__Acetobacteraceae	0	0	0	2.95192e-06	0	0	0	0	0	0	0	0	0	0	0	0	0	0	0
p__Proteobacteria	c__Alphaproteobacteria	o__Rhodospirillales	f__Rhodospirillaceae	0	0	2.95192e-06	0	0	0	0	5.90383e-06	0	0	0	0	2.95192e-06	0	0	0	2.95192e-06	0	0
p__Proteobacteria	c__Alphaproteobacteria	o__Rickettsiales	f__Rickettsiaceae	0	0	0	0	0	0	0	0	0	0	0	0	0	0	0	0	0	2.95192e-06	0
p__Proteobacteria	c__Alphaproteobacteria	o__Sphingomonadales	f__Erythrobacteraceae	2.95192e-06	0	2.95192e-06	0	0	2.95192e-06	0	0	0	0	2.95192e-06	2.95192e-06	0	0	0	0	2.95192e-06	8.85575e-06	2.95192e-06
p__Proteobacteria	unclassified	unclassified	unclassified	0	0	0	0	0	0	0	0	0	2.95192e-06	0	0	0	0	0	0	0	0	0
p__Synergistetes	c__Synergistia	o__Synergistales	f__Dethiosulfovibrionaceae	5.90383e-06	0	0	0	0	0	0	0	2.95192e-06	0	0	0	0	0	0	0	0	0	0
p__TM7	unclassified	unclassified	unclassified	0	0	0	0	2.95192e-06	0	0	0	0	0	0	0	0	0	0	0	0	0	0
p__Tenericutes	c__Mollicutes	o__Anaeroplasmatales	f__Anaeroplasmataceae	0	0	0	0	0	0	0	0	0	0	0.000129884	0	0	0	0	0	2.95192e-06	0.000247961	0
unclassified	unclassified	unclassified	unclassified	0.099084	0.156573	0.0819541	0.174249	0.158249	0.116489	0.345383	0.0712593	0.138091	0.09264	0.0149987	0.0497693	0.0161706	0.0417017	0.149875	0.0198074	0.0736474	0.0865384	0.0996892

## Sheet: Table S2C
Table S2C	Relative abundance of microbiota in male mice on the diet for 0, 4, 8weeks
Phylum	Class	Order	Family	Week0-HF1	Week0-HF2	Week0-HF3	Week0-HF4	Week0-HF5	Week0-LF1	Week0-LF2	Week0-LF3	Week0-LF4	Week0-LF5	Week4-HF1	Week4-HF2	Week4-HF3	Week4-HF4	Week4-HF5	Week4-LF1	Week4-LF2	Week4-LF3	Week4-LF4	Week4-LF5	Week8-HF1	Week8-HF2	Week8-HF3	Week8-HF4	Week8-LF1	Week8-LF2	Week8-LF3	Week8-LF4	Week8-LF5
p__Actinobacteria	c__Actinobacteria	o__Actinomycetales	f__ACK-M1	6.1909e-05	4.84505e-05	0	0	0.000228794	2.42253e-05	0	0.000123818	2.15336e-05	2.6917e-05	0	0	0	0	0	0	0	0	0	0	0	0	2.6917e-06	0	0	0	0	0	0
p__Actinobacteria	c__Actinobacteria	o__Actinomycetales	f__Actinosynnemataceae	0	0	0	0	0	0	0	0	0	0	0	0	0	0	0	0	0	0	8.07509e-06	0	0	0	0	0	0	0	0	0	0
p__Actinobacteria	c__Actinobacteria	o__Actinomycetales	f__Corynebacteriaceae	0	0	0	0	0	0	0	0	0	0	0	0	0	0	0	0	0	0	0	0	5.38339e-06	0	0	0	0	0	0	0	0
p__Actinobacteria	c__Actinobacteria	o__Actinomycetales	f__Microbacteriaceae	0	0	2.6917e-06	0	0	0	0	0	0	0	2.6917e-06	2.6917e-06	0	0	0	0	0	2.6917e-06	5.38339e-06	0	0	0	0	0	5.38339e-06	0	0	0	0
p__Actinobacteria	c__Actinobacteria	o__Actinomycetales	f__Micrococcaceae	0	0	0	0	2.6917e-06	0	0	2.6917e-06	0	0	5.38339e-06	0	8.07509e-06	0	2.6917e-06	2.6917e-06	0	2.6917e-06	0	0	0	2.6917e-06	8.07509e-06	2.6917e-06	0	5.38339e-06	2.6917e-06	2.6917e-06	0
p__Actinobacteria	c__Actinobacteria	o__Actinomycetales	f__Propionibacteriaceae	2.6917e-06	2.6917e-06	0	0	0	0	0	0	0	0	5.38339e-06	0	0	0	0	0	0	0	0	0	8.07509e-06	2.6917e-06	5.38339e-06	3.4992e-05	2.6917e-06	1.88419e-05	0	1.07668e-05	2.6917e-06
p__Actinobacteria	c__Actinobacteria	o__Actinomycetales	f__Streptomycetaceae	0.000360687	0.000799434	0.000392988	0.000366071	0.000236869	0.000290703	0.000255711	0.000150735	0.000263786	0.000231486	0.000401063	0.00031762	0.000371454	0.00017496	0.000611015	4.30671e-05	5.92173e-05	1.61502e-05	1.34585e-05	0.00012651	0.000344537	0.000527572	0.000452205	0.000115743	3.4992e-05	0.00017496	8.07509e-06	2.15336e-05	0.00014266
p__Actinobacteria	c__Actinobacteria	o__Actinomycetales	f__Thermomonosporaceae	0	2.6917e-06	2.6917e-06	0	2.6917e-06	0	0	0	0	0	2.6917e-06	1.61502e-05	0	1.34585e-05	0	5.38339e-06	0	0	0	1.34585e-05	2.6917e-06	3.4992e-05	0	2.6917e-06	0	0	0	0	1.61502e-05
p__Actinobacteria	c__Actinobacteria	o__Bifidobacteriales	f__Bifidobacteriaceae	0	0	8.07509e-06	2.6917e-06	0	0	0	0	0	0	5.38339e-06	0	0	2.15336e-05	0	0	0	0	0	0	0	0	5.38339e-06	0	0	0	0	0	0
p__Actinobacteria	c__Coriobacteriia	o__Coriobacteriales	f__Coriobacteriaceae	0.00015881	7.26758e-05	0.000177652	0.000118435	0.00015881	0.000148043	0.000247636	0.000188419	0.00028532	9.42094e-05	0.00227179	0.000750983	0.00103899	0.00205376	0.00229063	0.154506	0.00276168	0.010896	0.00264325	0.00151812	0.00458934	0.00111167	0.000707916	0.00138084	0.0493361	0.0011655	0.00384643	0.00359072	0.0403028
p__Bacteroidetes	c__Bacteroidia	o__Bacteroidales	f__Bacteroidaceae	2.42253e-05	0	1.07668e-05	0	2.6917e-06	1.34585e-05	0.119439	5.38339e-06	5.38339e-06	2.6917e-06	0	2.6917e-06	0	0	0	5.38339e-06	0.0193937	0	2.6917e-06	0	0	0	0	0	2.6917e-06	0.0473738	8.07509e-06	1.88419e-05	5.38339e-06
p__Bacteroidetes	c__Bacteroidia	o__Bacteroidales	f__Marinilabiaceae	8.07509e-06	0	8.07509e-06	8.07509e-06	0	0	0.00922713	0	0	0	0	2.6917e-06	0	0	0	2.6917e-06	0.0297863	2.6917e-06	2.6917e-06	2.6917e-06	2.6917e-06	2.6917e-06	5.38339e-06	0	5.38339e-06	0.0382248	2.6917e-06	8.07509e-06	1.34585e-05
p__Bacteroidetes	c__Bacteroidia	o__Bacteroidales	f__Porphyromonadaceae	0	0	5.38339e-06	0	2.6917e-06	0	1.34585e-05	2.6917e-06	5.38339e-06	0	2.6917e-06	0	0	0	0	0	0	0	0	0	0	0	0	0	5.38339e-06	0	2.6917e-06	0	0
p__Bacteroidetes	c__Bacteroidia	o__Bacteroidales	f__Rikenellaceae	0	2.6917e-06	5.38339e-06	0	2.6917e-06	4.57588e-05	1.88419e-05	0.00971971	2.6917e-06	1.07668e-05	8.07509e-06	5.38339e-06	0	5.38339e-06	2.6917e-06	0.00455973	0.000468355	0.0136092	0	1.34585e-05	2.15336e-05	0.00510884	0	5.38339e-06	0.0357511	6.46007e-05	0.0110521	1.07668e-05	0.015165
p__Bacteroidetes	c__Bacteroidia	o__Bacteroidales	f__S24-7	0.311569	0.0801479	0.359506	0.121264	0.612956	0.592092	0.175714	0.484898	0.102053	0.0918218	0.212884	0.302495	0.0951595	0.10419	0.120709	0.291556	0.561603	0.622156	0.595917	0.52519	0.0708427	0.140391	0.1063	0.197366	0.315774	0.375187	0.69376	0.251698	0.306988
p__Bacteroidetes	c__Bacteroidia	o__Bacteroidales	f__[Barnesiellaceae]	1.34585e-05	0.00467548	0.000102284	8.07509e-06	8.07509e-06	0.0157491	0.0162498	0.012764	2.6917e-06	0.00646545	1.88419e-05	0.00190303	0.000250328	5.38339e-06	2.6917e-06	0.00133239	0.00107668	0.00231755	2.6917e-06	0.000406446	5.38339e-06	0.00113051	0.000236869	5.38339e-06	0.00221527	0.00170115	0.00290165	8.07509e-06	0.00139968
p__Bacteroidetes	c__Bacteroidia	o__Bacteroidales	f__[Odoribacteraceae]	2.6917e-06	0	1.61502e-05	5.38339e-06	0	2.6917e-06	2.6917e-06	0	0	5.38339e-06	0	0	0	0	0	0	0	0	0	0	0	0	0	0	0	0	2.6917e-06	0	0
p__Bacteroidetes	c__Bacteroidia	o__Bacteroidales	f__[Paraprevotellaceae]	5.38339e-06	0	2.6917e-06	2.6917e-06	5.38339e-06	0	0.00132431	0	0	0	0	0	0	0	0	0	5.38339e-06	0	0	0	0	0	0	0	0	0	0	0	0
p__Bacteroidetes	c__Bacteroidia	o__Bacteroidales	unclassified	0	0	1.88419e-05	0	0	0	0	2.6917e-06	0	0	0	0	1.07668e-05	0	0	0	0	3.4992e-05	0	0	0	0	8.07509e-06	0	0	0	2.15336e-05	0	0
p__Bacteroidetes	c__Cytophagia	o__Cytophagales	f__Cytophagaceae	0.00158272	0.00108206	0.0012651	8.61343e-05	0.00111705	8.07509e-05	2.42253e-05	0.000987852	8.07509e-06	1.61502e-05	0.000156118	0.00120588	2.6917e-05	0.00026917	0.00330002	0	0.000347229	0.000193802	0	0.00270515	0.00030147	0	0	0.000193802	0	0.000995927	0.000199185	0	0.000417213
p__Bacteroidetes	c__Flavobacteriia	o__Flavobacteriales	f__Flavobacteriaceae	0	0	0	0	0	0	2.6917e-06	0	0	0	0	0	0	0	0	0	0	0	0	0	0	0	0	0	0	2.6917e-06	0	0	0
p__Bacteroidetes	c__[Saprospirae]	o__[Saprospirales]	f__Chitinophagaceae	0.000336462	0.00109552	0.00177921	0.0021399	0.000616398	0.000430671	0.000944785	0.0010686	0.00150735	0.000401063	2.6917e-05	8.61343e-05	4.03754e-05	8.8826e-05	0	4.30671e-05	3.4992e-05	2.6917e-05	2.15336e-05	7.26758e-05	0	0	0	1.34585e-05	0.000282628	0.000177652	1.34585e-05	4.03754e-05	0.000129201
p__Chloroflexi	c__Ktedonobacteria	o__Ktedonobacterales	f__Ktedonobacteraceae	0	0	0	0	0	0	0	0	0	0	0	0	0	0	2.6917e-06	1.07668e-05	0	2.42253e-05	1.34585e-05	0	0	0	0	0	1.61502e-05	0	2.96087e-05	2.96087e-05	1.07668e-05
p__Cyanobacteria	c__4C0d-2	o__YS2	unclassified	0	0	0	0	1.07668e-05	0	0	0	0	0	0	0	0	0	0	0	0	6.1909e-05	0	0	0	0	0	0	0	0	1.34585e-05	0	0
p__Firmicutes	c__Bacilli	o__Bacillales	f__Bacillaceae	0.00699572	0.00708185	0.00337	0.00234447	0.00318428	0.000376837	0.00254365	0.00298778	0.000576023	0.00720567	0.000376837	0.000331079	0.000750983	0.0007456	0.000384913	4.30671e-05	0.00061909	0.000323004	0.000223411	0.000543723	3.76837e-05	0.00026917	2.6917e-06	0.000223411	7.53675e-05	0.000395679	0.000253019	0.00026917	0.000231486
p__Firmicutes	c__Bacilli	o__Bacillales	f__Planococcaceae	0	0	0	0	0	0	5.38339e-06	0	0	0	1.07668e-05	4.84505e-05	3.23004e-05	2.6917e-06	3.23004e-05	2.6917e-06	0	0	5.38339e-06	1.07668e-05	1.88419e-05	2.42253e-05	3.23004e-05	8.07509e-06	5.38339e-06	2.6917e-06	1.34585e-05	0	2.6917e-06
p__Firmicutes	c__Bacilli	o__Bacillales	f__Thermoactinomycetaceae	0	0	0	0	0	0	0	0	0	0	0	0	0	0	0	8.07509e-06	0	8.07509e-06	2.6917e-06	0	0	0	0	0	5.38339e-06	0	1.34585e-05	8.07509e-06	5.38339e-06
p__Firmicutes	c__Bacilli	o__Gemellales	f__Gemellaceae	0	0	0	0	0	0	0	0	0	8.07509e-06	0	0	0	0	0	0	0	0	0	0	0	0	0	0	0	0	0	0	0
p__Firmicutes	c__Bacilli	o__Lactobacillales	f__Aerococcaceae	8.07509e-06	2.6917e-06	5.38339e-06	5.38339e-06	0	0	0.000115743	0	5.38339e-05	0	0	9.69011e-05	0.000756367	0.000118435	7.53675e-05	2.6917e-05	0.00930788	5.38339e-06	0.00172807	6.1909e-05	2.6917e-06	5.92173e-05	4.57588e-05	0.000193802	0.000621782	0.00323811	3.23004e-05	0.00369839	0.000261094
p__Firmicutes	c__Bacilli	o__Lactobacillales	f__Carnobacteriaceae	0	0	0	0	0	0	0	0	0	0	0	0	0	0	0	0	0	0	0	0	2.6917e-06	0	0	0	0	0	0	0	0
p__Firmicutes	c__Bacilli	o__Lactobacillales	f__Enterococcaceae	0	0	2.6917e-06	5.38339e-06	0	0	3.23004e-05	0	0	0	0.000694458	0.000713299	0.00889605	4.03754e-05	0.000398371	0	0.000250328	0.000266478	3.4992e-05	0.000212644	0.00215336	0.00203761	0.00238753	0.000646007	2.6917e-06	0.000314928	0.00218566	2.15336e-05	0.000121126
p__Firmicutes	c__Bacilli	o__Lactobacillales	f__Lactobacillaceae	0	0	0	0	0	2.6917e-06	2.6917e-06	2.6917e-06	0	0	0	0	0	2.6917e-06	8.07509e-06	1.88419e-05	0	0	1.07668e-05	0	0	2.6917e-06	0	0.000899026	0	0	0	9.95927e-05	2.6917e-06
p__Firmicutes	c__Bacilli	o__Lactobacillales	f__Streptococcaceae	2.15336e-05	3.23004e-05	2.15336e-05	2.6917e-06	1.07668e-05	1.07668e-05	5.38339e-06	0	2.6917e-06	5.11422e-05	0.0383863	0.014519	0.0600356	0.0232213	0.0499579	0.00304162	0.0141341	0.00781938	0.00847346	0.00797011	0.0395141	0.0211083	0.0456673	0.0237973	0.00743985	0.00936172	0.00971164	0.00904679	0.00823121
p__Firmicutes	c__Bacilli	o__Turicibacterales	f__Turicibacteraceae	0.00345345	1.07668e-05	0.00740216	1.34585e-05	0.00271323	0.012398	2.6917e-06	0.00270515	2.96087e-05	0.00324349	5.38339e-06	1.34585e-05	0	2.6917e-06	5.38339e-06	2.15336e-05	0.0796231	0.0057064	8.07509e-06	0.00901987	0	1.34585e-05	1.34585e-05	0	5.38339e-06	0.0376084	0.029789	1.34585e-05	0.00676423
p__Firmicutes	c__Clostridia	o__Clostridiales	f__Christensenellaceae	0.00160963	0.00111436	0.00251943	0.00207261	0.0007456	0.000823659	0.000694458	0.00121395	0.0018815	0.00197032	0.0111086	0.0126483	0.0157626	0.0195229	0.013122	0.0052838	0.00186535	0.00168231	0.000627165	0.00383836	0.00587059	0.0127775	0.0179617	0.0128555	0.00713569	0.00351805	0.000785975	0.000834426	0.00605632
p__Firmicutes	c__Clostridia	o__Clostridiales	f__Clostridiaceae	0.0019784	0.00163924	0.00130816	0.00128932	0.00201608	0.00118973	0.00127856	0.00682614	0.00138353	0.00227717	0.00301739	0.000955552	0.000584098	0.0018788	0.000371454	0.000538339	0.0145917	0.0152673	6.72924e-05	0.0160048	0.00239292	0.00160694	0.00191918	0.00144813	0.00049258	0.00578984	0.033369	0.000102284	0.00450321
p__Firmicutes	c__Clostridia	o__Clostridiales	f__Dehalobacteriaceae	0.000298778	0.000686382	0.000344537	0.00156657	0.000255711	0.000215336	0.000247636	0.000403754	0.00115474	0.000737525	0.0021722	0.00276437	0.00157464	0.00209414	0.00199455	0.000990544	0.00181689	0.000306853	0.000489889	0.00191918	0.00129471	0.00134585	0.000627165	0.00223142	0.00152081	0.00230948	0.000129201	0.000487197	0.00121934
p__Firmicutes	c__Clostridia	o__Clostridiales	f__Heliobacteriaceae	0	0	0	0	0	0	0	0	0	0	0	0	0	0	0	0	0	0	0	0.00242522	0	0	0	0.00135392	0	0	0	0	0.00102554
p__Firmicutes	c__Clostridia	o__Clostridiales	f__Lachnospiraceae	0.377042	0.586014	0.276023	0.521648	0.203269	0.217686	0.434031	0.296337	0.562756	0.606741	0.444768	0.414147	0.514956	0.566465	0.480613	0.221101	0.142794	0.0346421	0.0399259	0.218251	0.524929	0.522593	0.574066	0.443976	0.224797	0.309314	0.0240611	0.0503536	0.295648
p__Firmicutes	c__Clostridia	o__Clostridiales	f__Peptostreptococcaceae	0.000131893	6.99841e-05	5.11422e-05	5.38339e-06	0.000148043	0.000487197	1.34585e-05	0.000306853	0.000538339	0.000215336	0.00374684	0.00267555	0.00620436	0.0131409	0.00678577	2.6917e-06	0.0280421	0.0031116	3.76837e-05	0.00821236	0.00531879	0.00363917	5.38339e-06	0.0252669	2.6917e-06	0.0101908	0.00345345	0	0.00311968
p__Firmicutes	c__Clostridia	o__Clostridiales	f__Ruminococcaceae	0.15716	0.249095	0.158638	0.284798	0.113005	0.11651	0.206407	0.0845946	0.296334	0.223384	0.220628	0.184575	0.255116	0.24358	0.264629	0.132475	0.0701564	0.0591204	0.0269762	0.12855	0.293441	0.25022	0.219263	0.249644	0.18535	0.123856	0.0365882	0.0509888	0.131188
p__Firmicutes	c__Clostridia	o__Clostridiales	f__Veillonellaceae	0.00113051	0	0.000266478	0.000274553	0.00130816	0.000559873	0.000129201	0.00128663	0.000164193	0.000215336	0.000503347	0.00202685	0.011219	0.00384105	0.0158164	0.0126806	8.07509e-06	0.00315198	0.023162	0.00028532	0.000457588	0.00331617	0.00124356	0.000592173	0.00397294	1.61502e-05	0.00060294	0.12139	0.00282628
p__Firmicutes	c__Clostridia	o__Clostridiales	f__[Mogibacteriaceae]	6.72924e-05	1.34585e-05	0.000107668	2.42253e-05	0.000129201	6.99841e-05	1.88419e-05	8.8826e-05	8.07509e-06	3.4992e-05	5.38339e-05	0.00012651	2.6917e-05	2.96087e-05	2.96087e-05	5.38339e-06	5.38339e-06	1.07668e-05	2.6917e-06	3.4992e-05	1.61502e-05	4.57588e-05	2.15336e-05	0.000107668	0	1.34585e-05	8.07509e-06	2.6917e-06	2.6917e-06
p__Firmicutes	c__Clostridia	o__Halanaerobiales	f__Halanaerobiaceae	0.00190841	0.000454897	0.00227717	0.000721374	0.00201877	0.000527572	0.00034992	0.000616398	0.000166885	0.00118435	0.00180882	0.00901987	0.00264594	0.0020107	0.00284243	0.000495272	0.000775208	0.000699841	0.000376837	0.00342384	0.00244406	0.00266209	0.003405	0.00459742	0.00012651	0.00146967	0.000261094	0.000134585	0.000842501
p__Firmicutes	c__Clostridia	o__Halanaerobiales	f__Halobacteroidaceae	0	0	0	0	0	0	0	2.6917e-06	0	0	0	0	0	2.6917e-06	0	0	2.6917e-06	0	0	0	0	0	0	0	0	0	0	0	0
p__Firmicutes	c__Erysipelotrichi	o__Erysipelotrichales	f__Erysipelotrichaceae	0.00170654	0.000387604	0.00112513	0.000516806	0.000664849	0.000406446	0.00255173	0.000664849	0.000123818	0.00117089	0.0562672	0.0217543	0.0202093	0.00693112	0.01004	0.130442	0.0049581	0.203438	0.29817	0.0449217	0.0452528	0.00894989	0.0232536	0.0139268	0.125387	0.00540223	0.124992	0.506303	0.125982
p__Fusobacteria	c__Fusobacteriia	o__Fusobacteriales	f__Fusobacteriaceae	0	0	8.07509e-06	0	0	0	2.6917e-06	0	0	0	0	0	0	0	0	0	0	0	0	0	0	0	0	0	0	0	0	0	0
p__Proteobacteria	c__Alphaproteobacteria	o__Caulobacterales	f__Caulobacteraceae	0	0	0	0	0	0	0	0	0	0	0	0	0	2.6917e-06	0	0	0	0	0	0	0	0	0	0	0	0	0	0	0
p__Proteobacteria	c__Alphaproteobacteria	o__RF32	unclassified	0	0	0	0	0	0	0	0	0	0	2.6917e-06	0	0	0	0	0	0	0	0	0	0	0	0	0	0	0	0	0	0
p__Proteobacteria	c__Alphaproteobacteria	o__Rhizobiales	f__Bradyrhizobiaceae	8.07509e-06	8.07509e-06	2.6917e-06	2.6917e-06	2.6917e-06	0	1.07668e-05	0	5.38339e-06	1.07668e-05	5.38339e-06	2.6917e-06	5.38339e-06	0	1.88419e-05	0	2.6917e-06	8.07509e-06	1.07668e-05	5.38339e-06	2.6917e-05	1.34585e-05	1.07668e-05	8.07509e-06	5.38339e-06	5.38339e-06	0	5.38339e-06	8.07509e-06
p__Proteobacteria	c__Alphaproteobacteria	o__Rhizobiales	f__Hyphomicrobiaceae	0	0	0	0	0	0	0	1.61502e-05	0	0	0	0	0	0	0	0	0	0	0	0	0	0	0	0	0	0	0	0	0
p__Proteobacteria	c__Alphaproteobacteria	o__Rhizobiales	f__Methylobacteriaceae	0	0	0	0	2.6917e-06	0	0	8.07509e-06	0	0	0	0	5.38339e-06	0	0	0	0	0	0	0	0	0	0	0	0	0	0	0	0
p__Proteobacteria	c__Alphaproteobacteria	o__Rhizobiales	f__Phyllobacteriaceae	2.6917e-06	0	0	0	8.07509e-06	0	2.6917e-06	0	0	0	0	0	0	2.6917e-06	0	0	0	0	0	2.6917e-06	0	2.6917e-06	2.6917e-06	0	0	0	0	0	0
p__Proteobacteria	c__Alphaproteobacteria	o__Rhodospirillales	f__Acetobacteraceae	0.0224487	0.0145459	0.0265024	0.0337054	0.00724335	0.0145163	0.00229602	0.0116981	0.00521112	0.0157841	8.07509e-06	2.6917e-06	2.6917e-06	2.6917e-06	2.6917e-06	0.000183035	0.000166885	4.03754e-05	0.000161502	0.000559873	1.07668e-05	0	1.07668e-05	1.88419e-05	0.000516806	0.0010686	0.000328387	7.53675e-05	0.000608323
p__Proteobacteria	c__Alphaproteobacteria	o__Sphingomonadales	f__Sphingomonadaceae	2.6917e-06	0	0	0	0	0	0	1.07668e-05	0	0	0	0	0	0	0	0	2.6917e-06	2.6917e-06	0	0	5.38339e-06	0	0	0	0	0	0	0	0
p__Proteobacteria	c__Betaproteobacteria	o__Burkholderiales	f__Alcaligenaceae	0	0.000113051	0	0.00103899	0.00541838	0.00148851	2.6917e-06	0.00361226	0	0	0	0.0233074	1.88419e-05	0.00710339	0.000942094	0.0122338	0.00348575	0.00155849	1.07668e-05	5.38339e-06	2.6917e-06	0.00676154	1.34585e-05	0.0180909	0.00757443	0.0034696	1.07668e-05	0	0.00315736
p__Proteobacteria	c__Betaproteobacteria	o__Burkholderiales	f__Burkholderiaceae	5.38339e-06	0	8.07509e-06	0	2.6917e-06	1.07668e-05	0	5.38339e-06	0	0	2.6917e-06	2.6917e-06	0	0	0	0	0	0	0	0	8.07509e-06	1.61502e-05	0	2.6917e-06	0	0	0	0	5.38339e-06
p__Proteobacteria	c__Betaproteobacteria	o__Burkholderiales	f__Comamonadaceae	2.42253e-05	1.61502e-05	2.6917e-05	1.61502e-05	1.88419e-05	5.38339e-06	4.30671e-05	2.42253e-05	8.07509e-06	1.88419e-05	1.61502e-05	8.07509e-06	1.88419e-05	2.15336e-05	2.42253e-05	2.6917e-06	2.6917e-05	1.88419e-05	0	2.6917e-05	6.72924e-05	5.38339e-06	5.11422e-05	2.15336e-05	2.15336e-05	3.4992e-05	5.38339e-06	2.42253e-05	2.96087e-05
p__Proteobacteria	c__Betaproteobacteria	o__Burkholderiales	f__Oxalobacteraceae	2.6917e-06	2.6917e-06	1.07668e-05	8.07509e-06	1.61502e-05	0	5.38339e-06	5.38339e-06	5.38339e-06	1.34585e-05	1.07668e-05	5.38339e-06	5.38339e-06	5.38339e-06	0	0	8.07509e-06	0	2.6917e-06	2.6917e-06	8.07509e-06	2.6917e-06	1.61502e-05	2.6917e-06	8.07509e-06	1.34585e-05	0	8.07509e-06	1.07668e-05
p__Proteobacteria	c__Betaproteobacteria	o__Burkholderiales	unclassified	0	0	0	0	2.6917e-06	0	0	0	0	0	0	0	0	0	0	8.07509e-06	0	0	0	0	0	0	0	1.07668e-05	0	0	0	0	0
p__Proteobacteria	c__Betaproteobacteria	o__Rhodocyclales	f__Rhodocyclaceae	0	0	0	0	0	0	2.6917e-06	0	0	0	2.6917e-06	0	0	0	0	0	0	0	0	0	2.6917e-06	0	0	2.6917e-06	0	0	0	0	0
p__Proteobacteria	c__Deltaproteobacteria	o__Desulfovibrionales	f__Desulfovibrionaceae	0	0	0	2.6917e-06	0	2.6917e-06	0	0	0	0	8.07509e-06	0.00231486	2.6917e-06	2.6917e-06	0.0220827	0.0199212	0.00788129	0.00533763	0	0.0155849	2.6917e-06	0.01369	5.38339e-06	0	0.0254392	0.00894451	0.0113697	1.07668e-05	0.0384697
p__Proteobacteria	c__Epsilonproteobacteria	o__Nautiliales	f__Nautiliaceae	0	0	0	0	0	0	0	0	0	0	0	0	0	5.38339e-06	2.6917e-06	0	0	0	0	0	0	0	0	0	0	0	0	0	0
p__Proteobacteria	c__Gammaproteobacteria	o__Aeromonadales	f__Aeromonadaceae	0	0	0	0	0	0	0	0	0	0	5.38339e-06	0	0	0	0	0	0	0	0	0	0	0	0	0	0	0	0	0	0
p__Proteobacteria	c__Gammaproteobacteria	o__Enterobacteriales	f__Enterobacteriaceae	0	0	0	0	0	0	0	0	0	0	0	0	0	5.38339e-06	0	0	0	0	0	0	0	0	0	2.6917e-06	0	0	0	0	0
p__Proteobacteria	c__Gammaproteobacteria	o__Pasteurellales	f__Pasteurellaceae	0.000462972	0.00161233	0.000707916	0.000818276	0.000928635	0.000500655	0.000279936	0.000118435	0.000541031	0.000323004	0	0	0	0	0	0	0.00011036	7.26758e-05	8.07509e-06	5.38339e-06	0	0	0	0	2.42253e-05	0.000379529	1.07668e-05	2.6917e-06	8.07509e-06
p__Proteobacteria	c__Gammaproteobacteria	o__Pseudomonadales	f__Moraxellaceae	0	0	1.07668e-05	0	0	0	5.38339e-06	0	0	0	8.07509e-06	0	0	0	0	0	0	0	0	0	0	0	0	0	0	0	0	0	2.6917e-06
p__Proteobacteria	c__Gammaproteobacteria	o__Pseudomonadales	f__Pseudomonadaceae	0	0	0	0	0	0	0	5.38339e-06	0	0	0	2.6917e-06	0	0	0	0	0	0	0	0	1.61502e-05	0	1.34585e-05	0	0	5.38339e-06	1.07668e-05	2.6917e-06	2.6917e-06
p__Proteobacteria	c__Gammaproteobacteria	o__Xanthomonadales	f__Sinobacteraceae	0.000258403	0.000164193	0.000374146	0.000121126	0.00019111	0.000153427	0.000290703	0.00015881	0.000166885	0.000150735	0.000578715	0.000201877	0.000339154	0.000449513	0.000516806	0.000196494	0.00057064	0.000282628	0.000104976	0.000325695	0.000559873	0.000392988	0.000750983	0.000312237	0.000473738	0.000750983	0.000325695	0.00031762	0.000438746
p__Proteobacteria	c__Gammaproteobacteria	o__Xanthomonadales	f__Xanthomonadaceae	1.07668e-05	0	0	0	0	0	2.6917e-06	0	2.6917e-06	0	0	0	0	2.6917e-06	2.6917e-05	5.38339e-06	0	2.6917e-06	0	0	2.6917e-06	0	2.6917e-06	4.03754e-05	2.6917e-06	0	0	2.6917e-06	5.38339e-06
p__Synergistetes	c__Synergistia	o__Synergistales	f__Dethiosulfovibrionaceae	0.00522997	0.00222603	0.00937248	0	0.000185727	0.00144813	0.00105784	0.000923252	0.000274553	0.00270785	0	0	0.00201877	0	0	0.0018788	0.00105514	0.000244944	1.34585e-05	4.84505e-05	0	0	0.001004	5.38339e-06	0.000613707	0.00124626	0.000123818	8.07509e-06	0.000215336
p__TM7	c__TM7-3	o__Blgi18	unclassified	0	0	0	0	0	0	0	0	0	0	0	0	0	0	0	0	0	0	8.07509e-06	0	0	0	0	0	0	0	0	0	0
p__TM7	c__TM7-3	o__CW040	f__F16	0	0	0	0	0	2.6917e-06	0.000277245	1.07668e-05	0	0.000204569	0	0	0.0011036	0	0	0.000331079	0	0	2.6917e-06	0.00162848	0	2.6917e-06	0.00042798	0	0.00151542	0.00363648	0.00134316	0	0.002043
p__TM7	c__TM7-3	o__EW055	unclassified	0	0	0	0	0	2.6917e-06	0	0	0	0	0	0	0	0	0	0	0	0	0	0	0	0	0	0	0	0	0	0	0
p__Tenericutes	c__Mollicutes	o__Anaeroplasmatales	f__Anaeroplasmataceae	0.0992213	0.0376164	0.115186	0.0118704	0.01857	0.0113159	0.0135285	0.0394037	0.0198728	0.0229682	2.6917e-06	5.38339e-06	6.1909e-05	1.34585e-05	2.6917e-06	2.6917e-06	2.6917e-06	0.000718683	1.34585e-05	2.6917e-06	1.07668e-05	1.07668e-05	2.42253e-05	5.38339e-06	8.07509e-06	3.23004e-05	5.38339e-06	2.15336e-05	5.38339e-06
p__Tenericutes	c__Mollicutes	o__RF39	unclassified	0.00468355	0.00916253	0.0310245	0.0131274	0.0225887	0.0104115	0.0102984	0.0360472	0.00458396	0.0103038	1.07668e-05	0.000942094	0.000740216	0.00192995	0.00235254	0.00599171	0.00219912	0.0068073	0.000710608	0.00606708	5.38339e-06	0.000118435	1.88419e-05	0.00058679	0.00342384	0.00251943	0.00835233	0.000328387	0.00236331

## Sheet: Table S2D
Table S2D	Relative abundance of microbiota in female mice on the diet for 0, 4, 8weeks
Phylum	Class	Order	Family	Week0_HF1	Week0_HF2	Week0_HF3	Week0_HF4	Week0_HF5	Week0_LF1	Week0_LF2	Week0_LF3	Week0_LF4	Week0_LF5	Week4-HF1	Week4-HF2	Week4-HF3	Week4-HF4	Week4-LF1	Week4-LF2	Week4-LF3	Week4-LF4	Week4-LF5	Week8-HF1	Week8-HF2	Week8-HF3	Week8-HF4	Week8-HF5	Week8-LF1	Week8-LF2	Week8-LF3	Week8-LF4
k__Bacteria_unclassified	k__Bacteria_unclassified	k__Bacteria_unclassified	k__Bacteria_unclassified	0.0847463	0.0699048	0.0500872	0.0373095	0.0996251	0.0832359	0.0634349	0.176861	0.128384	0.103728	0.0944741	0.101631	0.153395	0.271073	0.155467	0.131101	0.0724263	0.143438	0.110664	0.238174	0.159877	0.251497	0.185199	0.245326	0.196113	0.0588705	0.0719769	0.0834606
p__Actinobacteria	c__Actinobacteria	o__Actinomycetales	f__Propionibacteriaceae	0	0	0	0	0	4.16075e-06	4.16075e-06	4.16075e-06	0	0	0	0	4.16075e-06	1.24823e-05	0	8.32151e-06	0	8.32151e-06	0	0	0	0	4.16075e-06	0	8.32151e-06	0	0	0
p__Actinobacteria	c__Actinobacteria	o__Bifidobacteriales	f__Bifidobacteriaceae	0	0	0	0	0	4.16075e-06	4.16075e-06	4.16075e-06	0	0	0	0	1.24823e-05	4.16075e-06	0.00141882	0	0.00703168	4.16075e-06	0.000378629	0	0	0	0	0	9.98581e-05	0	0.0035408	0
p__Actinobacteria	c__Coriobacteriia	o__Coriobacteriales	f__Coriobacteriaceae	0	1.6643e-05	1.6643e-05	8.32151e-06	1.24823e-05	1.24823e-05	4.57683e-05	4.57683e-05	3.3286e-05	4.16075e-06	0.000307896	0.000178912	0.000316217	0.000262128	4.57683e-05	0.000316217	0.00010818	2.49645e-05	3.3286e-05	0.00016643	0.000407754	0.000320378	0.000682364	0.000153948	3.74468e-05	0.000104019	7.48936e-05	9.56974e-05
p__Actinobacteria	p__Actinobacteria_unclassified	p__Actinobacteria_unclassified	p__Actinobacteria_unclassified	7.07328e-05	0.000228842	5.40898e-05	0.000212199	2.91253e-05	9.56974e-05	0.000266288	9.56974e-05	0.000262128	6.24113e-05	0.000208038	0.000237163	7.48936e-05	0.00010818	2.91253e-05	1.6643e-05	0.000969456	0.000203877	7.07328e-05	8.32151e-05	0.000149787	9.56974e-05	0.000141466	5.40898e-05	1.24823e-05	1.6643e-05	1.6643e-05	2.08038e-05
p__Bacteroidetes	c__Bacteroidia	o__Bacteroidales	f__S24-7	0.0114379	0.0224431	0.0471663	0.0931843	0.00369891	0.00612047	0.0645375	0.00262544	0.0204876	0.00615792	0.000511773	0.00101938	0.000586666	0.000203877	0.0279894	0.0702668	0.0754761	0.0557292	0.0631769	0.0311849	0.000395272	0.000503451	0.000528416	0.0345259	0.0269409	0.0988221	0.0744401	0.0679035
p__Bacteroidetes	c__Bacteroidia	o__Bacteroidales	o__Bacteroidales_unclassified	0.202891	0.212748	0.558856	0.576327	0.0545849	0.0728507	0.614514	0.0495754	0.145647	0.0899139	0.522491	0.486376	0.535464	0.16452	0.509859	0.444177	0.628174	0.467677	0.576235	0.262469	0.457371	0.407954	0.333763	0.221668	0.302304	0.695037	0.594601	0.535007
p__Bacteroidetes	c__Flavobacteriia	o__Flavobacteriales	f__[Weeksellaceae]	0	0	0	4.16075e-06	0	0	0	0	0	0	0	0	0	0	0	0	0	0	0	0	0	0	0	0	0	0	4.16075e-06	0
p__Bacteroidetes	p__Bacteroidetes_unclassified	p__Bacteroidetes_unclassified	p__Bacteroidetes_unclassified	0	0	1.24823e-05	5.40898e-05	0	4.16075e-06	7.07328e-05	0	1.24823e-05	4.16075e-06	0.000128983	0.000104019	0.000104019	4.16075e-06	3.3286e-05	4.57683e-05	0.000133144	0.000124823	4.57683e-05	0.000104019	0.000124823	0.000174752	1.6643e-05	4.99291e-05	4.16075e-06	0.000128983	0.00011234	0.00011234
p__Cyanobacteria	c__Chloroplast	o__Streptophyta	o__Streptophyta_unclassified	0	0	0	0	0	0	0	0	0.000341182	0	4.16075e-06	8.32151e-06	4.16075e-06	0	8.32151e-06	0	0	0	0	0	0	0	0	0	0	0	0	0
p__Firmicutes	c__Bacilli	c__Bacilli_unclassified	c__Bacilli_unclassified	8.32151e-06	0	0	0	0	0	0	0	0	0	8.32151e-06	0	0	2.08038e-05	0.000178912	0.000353664	6.24113e-05	0.000145626	8.32151e-06	0	4.16075e-06	0	4.16075e-06	0	9.98581e-05	0.000162269	0.000137305	1.24823e-05
p__Firmicutes	c__Bacilli	o__Bacillales	f__Planococcaceae	0	0	0	0	0	0	0	0	0	0	0	0	0	4.16075e-06	0	4.16075e-06	0	4.16075e-06	0	2.08038e-05	4.16075e-06	0	0	1.6643e-05	0	8.32151e-06	0	0
p__Firmicutes	c__Bacilli	o__Lactobacillales	f__Enterococcaceae	0	0	0	0	0	0	4.16075e-06	0	0	0	5.82506e-05	0.000208038	0.000295414	0.000145626	7.90543e-05	4.99291e-05	8.32151e-05	4.16075e-05	4.99291e-05	3.3286e-05	0.000170591	0.000233002	0.000249645	1.24823e-05	6.24113e-05	8.32151e-06	4.16075e-05	2.49645e-05
p__Firmicutes	c__Bacilli	o__Lactobacillales	f__Streptococcaceae	0	0	0	0	0	0	0	0	0	0	0	0	0	1.6643e-05	0	0	0	0	0	0	4.16075e-06	2.08038e-05	0	0	0	0	4.16075e-06	0
p__Firmicutes	c__Bacilli	o__Lactobacillales	o__Lactobacillales_unclassified	0	0	0	0	0	0	0	0	0	0	0.00104851	0.000711489	0.00108596	0.000998581	3.74468e-05	0.000191395	0.000224681	5.82506e-05	0.000357825	0.000191395	0.00060747	0.000669882	0.000823829	0.000241324	0.000133144	0.000253806	0.000216359	9.98581e-05
p__Firmicutes	c__Bacilli	o__Turicibacterales	f__Turicibacteraceae	1.6643e-05	6.65721e-05	0	0	2.08038e-05	8.32151e-06	0	4.16075e-06	0	4.57683e-05	0.00310808	0.000674042	0.00033286	8.32151e-06	0.0242073	0.0997791	0.0169426	0.00404841	0.0087251	2.91253e-05	0.00118582	0.0018765	0.000341182	0	0.0204876	0.0641089	0.0383164	0.00272529
p__Firmicutes	c__Clostridia	c__Clostridia_unclassified	c__Clostridia_unclassified	0.00233002	0.000981938	0.00159773	0.00369891	0.00122326	0.000902884	0.00249229	0.00292501	0.0122493	0.00285012	0.0825743	0.0126154	0.000894562	0.121049	0.0351417	0.000736454	0.033777	0.0300906	0.0432927	0.0865312	0.138358	0.00612879	0.0605348	0.0760877	0.0279894	0.000461844	0.0456019	0.0533534
p__Firmicutes	c__Clostridia	o__Clostridiales	f__Clostridiaceae	2.49645e-05	0.00203877	0.00011234	0.00174752	4.57683e-05	0.000445201	0.000748936	0.000857116	0.000195555	0.00171839	0.00303735	1.24823e-05	2.08038e-05	8.73759e-05	0.000449362	0.0278396	0.00525919	0.0145876	0.000832151	1.24823e-05	1.6643e-05	2.49645e-05	0	0	0.00290005	0.00469749	0.00758506	0.00252974
p__Firmicutes	c__Clostridia	o__Clostridiales	f__Lachnospiraceae	0.539954	0.500377	0.215897	0.21373	0.61667	0.641784	0.177007	0.544035	0.517427	0.548591	0.155683	0.219417	0.143866	0.218115	0.0977861	0.147944	0.0611257	0.157501	0.0723139	0.235915	0.136743	0.172226	0.19769	0.260584	0.153087	0.0374302	0.0747812	0.144199
p__Firmicutes	c__Clostridia	o__Clostridiales	f__Ruminococcaceae	0.118261	0.173316	0.0948486	0.0444826	0.175218	0.164292	0.0501496	0.13552	0.0834689	0.183331	0.0881747	0.136606	0.0830112	0.188732	0.129358	0.0621409	0.0826201	0.0995502	0.10426	0.114217	0.0712987	0.105949	0.152675	0.127868	0.254642	0.0301114	0.071565	0.102717
p__Firmicutes	c__Clostridia	o__Clostridiales	o__Clostridiales_unclassified	0.0109012	0.00832151	0.00685276	0.00683612	0.0134642	0.00392359	0.00184738	0.0045061	0.0120121	0.0136806	0.0188025	0.0282765	0.0649993	0.0155779	0.0151493	0.00675291	0.00904964	0.0175584	0.0120828	0.0154239	0.0220811	0.0352	0.0390695	0.0161229	0.00540482	0.00391527	0.0102771	0.00247981
p__Firmicutes	c__Erysipelotrichi	o__Erysipelotrichales	f__Erysipelotrichaceae	0.00022052	0.000324539	0.000420236	0.000278771	0.000104019	7.90543e-05	0.00246317	0.000137305	0.00277522	0.000120662	0.0231463	0.0045061	0.00649078	0.00200548	0.000619952	0.00364482	0.00363234	0.00380709	0.00317466	0.00425645	0.00411083	0.00457683	0.00478903	0.0045061	0.000411915	0.00361986	0.00130232	0.000540898
p__Firmicutes	p__Firmicutes_unclassified	p__Firmicutes_unclassified	p__Firmicutes_unclassified	0.00517182	0.00273778	0.00476406	0.00146459	0.0107223	0.00476406	0.00449362	0.0108512	0.00873759	0.0070816	0.00621617	0.0074103	0.00899971	0.01703	0.00202629	0.00463092	0.00290421	0.00538818	0.0042939	0.0111883	0.00708993	0.0114213	0.0228842	0.0127236	0.00911621	0.00223433	0.00540066	0.00470165
p__Proteobacteria	c__Deltaproteobacteria	o__Desulfovibrionales	f__Desulfovibrionaceae	0	0	0	0	0	0	0	0	0	0	0	0	0	0	0	0	0	0	0	0	0	0.00112756	0.000586666	0	0	4.16075e-06	0	0
p__Proteobacteria	c__Gammaproteobacteria	c__Gammaproteobacteria_unclassified	c__Gammaproteobacteria_unclassified	0	0	0	0	4.16075e-06	0	0	4.16075e-06	1.6643e-05	0	0	8.32151e-06	4.16075e-06	0	0	0	0	0	0	0	0	0	0	4.16075e-06	0	0	0	0
p__Proteobacteria	c__Gammaproteobacteria	o__Enterobacteriales	f__Enterobacteriaceae	0	0	0	0	0	0	0	0	0	0	1.6643e-05	0	2.91253e-05	0	0	0	0	4.16075e-06	0	0	0	0	0	0	0	0	0	0
p__Proteobacteria	c__Gammaproteobacteria	o__Pseudomonadales	f__Pseudomonadaceae	0	4.16075e-06	0	0	0	0	4.16075e-06	0	4.16075e-06	0	0	0	4.16075e-06	0	8.32151e-06	0	0	0	0	0	0	0	0	0	0	0	4.16075e-06	0
p__Proteobacteria	p__Proteobacteria_unclassified	p__Proteobacteria_unclassified	p__Proteobacteria_unclassified	0	8.32151e-06	0	8.32151e-06	0	0	0	0	0	0	0	0	0	0	0	0	0	0	0	0	0	0	0	0	0	0	0	0
p__Tenericutes	c__Mollicutes	c__Mollicutes_unclassified	c__Mollicutes_unclassified	0.000237163	0.000145626	0.00016643	0.00011234	0.000104019	0.000128983	0.00033286	0.000378629	0.00055338	0.000133144	0	0	0	0	0	0	0	0	0	0	0	0	0	0	0	0	0	0
p__Tenericutes	c__Mollicutes	o__Anaeroplasmatales	f__Anaeroplasmataceae	0.0237288	0.00633683	0.0191478	0.0205416	0.0244736	0.0213447	0.0175792	0.0715691	0.0673917	0.042577	0	0	4.16075e-06	2.08038e-05	0.00010818	0	0	4.16075e-06	4.16075e-06	0	0	0	1.6643e-05	5.40898e-05	0.000145626	4.16075e-06	0	1.6643e-05
